# Supplementary material
Source: Springer Nature journal article supplement (https://www.springermedizin.de/resource/supplementary/13046_2009_107_MOESM2_ESM.pdf/9661644)

**A**

Overall Survival

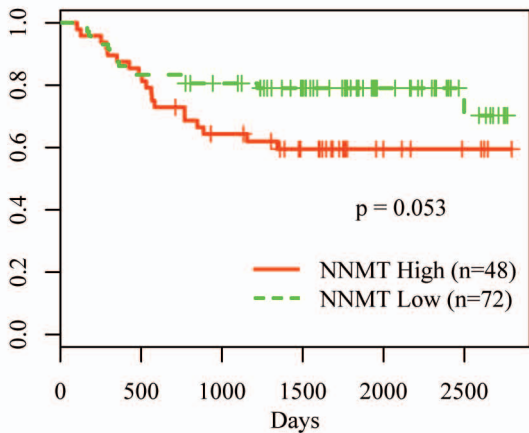**B**

Disease-free Survival

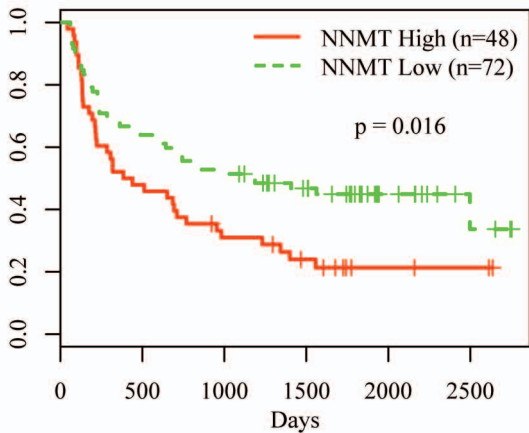

Supplement: MOESM2 [file 9661644]
